# Supplementary material for: A highly efficient and thermally stable broadband Cr3+-activated double borate phosphor for near-infrared light-emitting diodes
Source: Royal Society of Chemistry journal article supplement (doi:10.1039/d0tc04803h), 2020-11-10
Supplement: d0tc04803h1.pdf [file d0tc04803h1.pdf]

Electronic Supplementary Material (ESI) for Journal of Materials Chemistry C.  
This journal is © The Royal Society of Chemistry 2020

## Supporting Information

### **Highly efficient and thermally stable broadband Cr<sup>3+</sup>-activated double borate phosphor for near-infrared light-emitting diodes**

Decai Huang<sup>a,b</sup>, Haomiao Zhu<sup>a,b,\*</sup>, Zhonghua Deng<sup>a</sup>, Hongyi Yang<sup>a,b</sup>, Jie Hu<sup>a,b</sup>, Sisi Liang<sup>a,b</sup>, Dejian Chen<sup>a,b</sup>, En Ma<sup>a,b</sup> and Wang Guo<sup>a</sup>

<sup>a</sup> *CAS Key Laboratory of Design and Assembly of Functional Nanostructures, Fujian Key Laboratory of Nanomaterials Fujian Institute of Research on the Structure of Matter Chinese Academy of Sciences, Fuzhou, Fujian, 350002, China.*

<sup>b</sup> *Xiamen Institute of Rare Earth Materials, Haixi Institute, Chinese Academy of Sciences, Xiamen, Fujian, 361021, China.*

E-mail: zhm@fjirsm.ac.cn

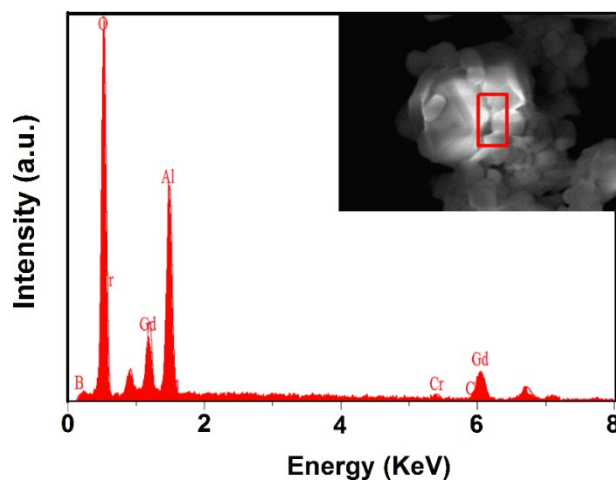

**Fig. S1.** EDS spectrum of the GAB: Cr<sup>3+</sup> (1.0 at.%) sample.

**Table S1.** Crystallographic data determined from Rietveld refinement for GdAl<sub>2.99</sub>Cr<sub>0.01</sub>(BO<sub>3</sub>)<sub>4</sub> and GdAl<sub>3</sub>(BO<sub>3</sub>)<sub>4</sub> crystals.

| Formula                    | GdAl <sub>2.99</sub> Cr <sub>0.01</sub> (BO <sub>3</sub> ) <sub>4</sub> | GdAl <sub>3</sub> (BO <sub>3</sub> ) <sub>4</sub> |
|----------------------------|-------------------------------------------------------------------------|---------------------------------------------------|
| Crystal system             | Trigonal                                                                | Trigonal                                          |
| Space group                | <i>R</i> 32                                                             | <i>R</i> 32                                       |
| <i>a</i> (Å)               | 9.3107(6)                                                               | 9.3014(7)                                         |
| <i>b</i> (Å)               | 9.3107(6)                                                               | 9.3014(7)                                         |
| <i>c</i> (Å)               | 7.2612(4)                                                               | 7.2571(7)                                         |
| <i>V</i> (Å <sup>3</sup> ) | 545.12                                                                  | 543.74                                            |
| $\alpha$ (°)               | 90                                                                      | 90                                                |
| $\beta$ (°)                | 90                                                                      | 90                                                |
| $\gamma$ (°)               | 120                                                                     | 120                                               |
| <i>R</i> <sub>p</sub> (%)  | 6.56                                                                    | —                                                 |
| <i>R</i> <sub>wp</sub> (%) | 4.56                                                                    | —                                                 |
| $\chi^2$                   | 2.68                                                                    | —                                                 |

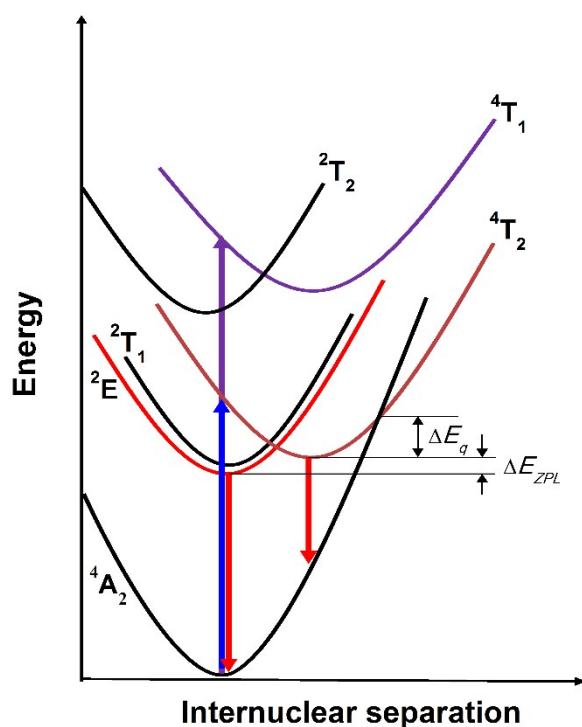

**Fig. S2.** Configurational coordinate diagram of  $\text{Cr}^{3+}$  ions in GAB crystal.  $\Delta E_a$  is the activation energy,  $\Delta E_{ZPL}$  is the energy gap between  ${}^2E$  ( ${}^2G$ ) and the  ${}^4T_2$  ( ${}^4F$ ) ZPL.

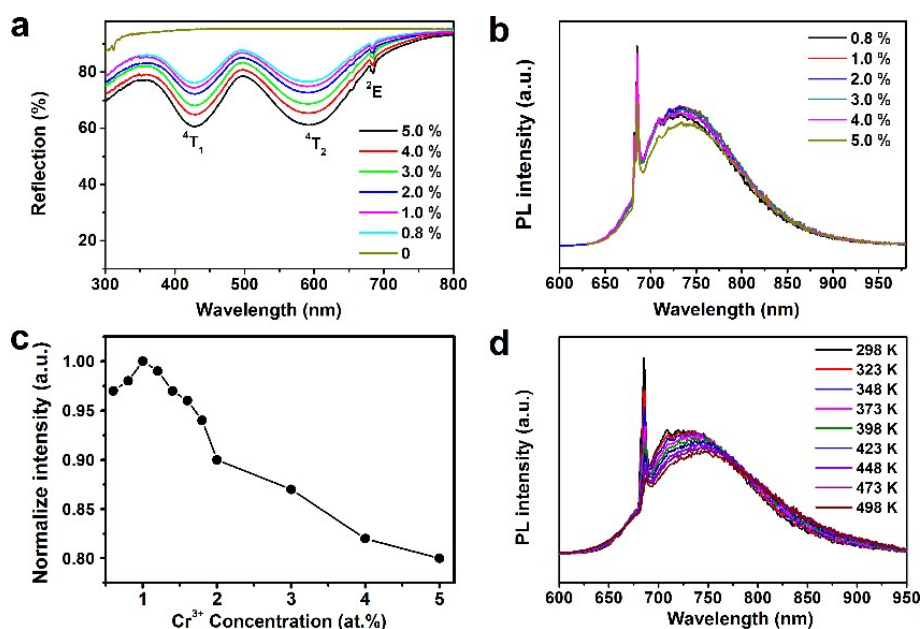

**Fig. S3.** (a) Diffuse reflection spectra and (b) PL spectra of GAB: $\text{Cr}^{3+}$  samples with  $\text{Cr}^{3+}$  doping concentrations of 0.8–5.0 at.% ( $\lambda_{\text{ex}} = 426$  nm). (c) The  $\text{Cr}^{3+}$  concentration dependent normalized PL intensity. (d) Temperature-dependent emission spectra of GAB: $\text{Cr}^{3+}$  (1.0 at.%) upon excitation at 426 nm.

**Table S2.** Several key optical parameters of Cr<sup>3+</sup>-activated phosphors.

| Phosphor                                                                                                 | Emission range | PL QY(%) | $I_{423\text{ k}}/I_{298\text{ k}}$ (%) | Ref.      |
|----------------------------------------------------------------------------------------------------------|----------------|----------|-----------------------------------------|-----------|
| GdAl <sub>3</sub> (BO <sub>3</sub> ) <sub>4</sub> :Cr <sup>3+</sup>                                      | 650-1000 nm    | 91       | 100                                     | This work |
| LiInSi <sub>2</sub> O <sub>6</sub> :Cr <sup>3+</sup>                                                     | 700-1100 nm    | 75       | 77                                      | 1         |
| Ca <sub>3</sub> Sc <sub>2</sub> Si <sub>3</sub> O <sub>12</sub> :Cr <sup>3+</sup>                        | 650-1000 nm    | 92.3     | 97.4                                    | 2         |
| Ga <sub>2</sub> O <sub>3</sub> :Cr <sup>3+</sup>                                                         | 650-900 nm     | 92.4     | ~85                                     | 3         |
| Na <sub>3</sub> AlF <sub>6</sub> :Cr <sup>3+</sup>                                                       | 640-850 nm     | ~75      | ~71                                     | 4         |
| Ca <sub>2</sub> LuZr <sub>2</sub> Al <sub>3</sub> O <sub>12</sub> :Cr <sup>3+</sup> , Yb <sup>3+</sup>   | 650-1100 nm    | ~77      | ~60                                     | 5         |
| ScBO <sub>3</sub> :Cr <sup>3+</sup>                                                                      | 650-1000 nm    | ~73      | 51                                      | 6         |
| La <sub>3</sub> Ga <sub>5</sub> GeO <sub>14</sub> :Cr <sup>3+</sup> , Pr <sup>3+</sup>                   | 650-1400 nm    | ~39      | 15                                      | 7         |
| La <sub>3</sub> Ga <sub>5</sub> GeO <sub>12</sub> :Cr <sup>3+</sup>                                      | 650-950 nm     | 35       | ~60                                     |           |
| Gd <sub>3</sub> Sc <sub>1.42</sub> Al <sub>0.5</sub> Ga <sub>3</sub> O <sub>12</sub> :8%Cr <sup>3+</sup> | 650-1000 nm    | 91       | 86                                      | 8         |
| La <sub>3</sub> Sc <sub>2</sub> Ga <sub>3</sub> O <sub>14</sub> :Cr <sup>3+</sup>                        | 650-1400 nm    | ~8       | 20                                      | 9         |
| Y/Gd/Lu <sub>3</sub> Sc <sub>2</sub> Ga <sub>3</sub> O <sub>12</sub> : Cr <sup>3+</sup>                  | 650-1100 nm    | ~60      | ~93                                     |           |
| Mg <sub>3</sub> Ga <sub>2</sub> GeO <sub>8</sub> :Cr <sup>3+</sup>                                       | 650-1200 nm    | ~35      | ~55                                     | 10        |
| K <sub>3</sub> Ga/AlF <sub>6</sub> :Cr <sup>3+</sup>                                                     | 650-1000 nm    | —        | ~40                                     | 11        |
| La <sub>2</sub> MgZrO <sub>6</sub> :Cr <sup>3+</sup>                                                     | 650-1200 nm    | ~58      | ~30                                     | 12        |
| Y <sub>3</sub> Ga <sub>5</sub> O <sub>12</sub> : Cr <sup>3+</sup>                                        | 600-1000 nm    | ~46      | —                                       | 13        |
| Gd <sub>3</sub> Ga <sub>5</sub> O <sub>12</sub> : Cr <sup>3+</sup>                                       | 600-1000 nm    | ~30      | —                                       |           |
| LaMgGa <sub>11</sub> O <sub>19</sub> :Cr <sup>3+</sup>                                                   | 650-1000 nm    | 82.6     | ~87                                     | 14        |

**Supplementary Discussion:** The  $D_q$  parameter is obtained from the peak energy of the  $^4A_2 \rightarrow ^4T_2$  transition, while Racah parameters  $B$  and  $C$  can be estimated by the following equations:<sup>15</sup>

$$E(^4T_2 - ^4A_2) = 10D_q \quad (1)$$

$$\frac{B}{D_q} = \frac{(\Delta E/D_q)^2 - 10(\Delta E/D_q)}{15(\Delta E/D_q - 8)} \quad (2)$$

$$3.05C = E(^2E) - 7.9B + 1.8B^2/\Delta E \quad (3)$$

where  $\Delta E = [E(^4T_1) - E(^4T_2)]$  is the difference between the energies of the  $^4T_1$  and  $^4T_2$  states and  $E(^2E)$  is the energy of the  $^2E$  state. The value of  $^4T_1$ ,  $^4T_2$  and  $^2E$  are estimated to be 23470, 16730 and 14598  $\text{cm}^{-1}$  from the excitation and emission bands, respectively. Based on equations (1) - (3), the values of  $B$ ,  $C$  and  $D_q/B$  were calculated to be 675  $\text{cm}^{-1}$ , 3197  $\text{cm}^{-1}$  and 2.48, respectively.

## References

- 1 X. Xu, Q. Shao, L. Yao, Y. Dong and J. Jiang, *Chem. Eng. J.*, 2020, **383**, 123108.
- 2 Z. Jia, C. Yuan, Y. Liu, X. Wang, P. Sun, L. Wang, H. Jiang and J. Jiang, *Light: Sci. Appl.*, 2020, **9**.
- 3 M. H. Fang, G. N. A. De Guzman, Z. Bao, N. Majewska, S. Mahlik, M. Grinberg, G. Leniec, S. M. Kaczmarek, C. W. Yang, K. M. Lu, H. S. Sheu, S. F. Hu and R. S. Liu, *J. Mater. Chem. C*, 2020, **8**, 11013-11017.
- 4 D. Yu, Y. Zhou, C. Ma, J. H. Melman, K. M. Baroudi, M. LaCapra and R. E. Riman, *ACS Appl. Electron. Mater.*, 2019, **1**, 2325-2333.
- 5 S. He, L. Zhang, H. Wu, H. Wu, G. Pan, Z. Hao, X. Zhang, L. Zhang, H. Zhang and J. Zhang, *Adv. Optical Mater.*, 2020, **8**, 1901684.
- 6 M. H. Fang, P. Y. Huang, Z. Bao, N. Majewska, T. Leńniewski, S. Mahlik, M. Grinberg, G. Leniec, S. M. Kaczmarek, C. W. Yang, K. M. Lu, H. S. Sheu and R. S. Liu, *Chem. Mater.*, 2020, **32**, 2166-2171.
- 7 T. Gao, W. Zhuang, R. Liu, Y. Liu, C. Yan, J. Tian, G. Chen, X. Chen, Y. Zheng and L. Wang, *J. Am. Ceram. Soc.*, 2020, **103**, 202-213.
- 8 E. T. Basore, W. Xiao, X. Liu, J. Wu and J. Qiu, *Adv. Optical Mater.*, 2020, **8**, 2000296.
- 9 B. Malysa, A. Meijerink and T. Jüstel, *J. Lumin.*, 2018, **202**, 523-531.
- 10 C. Wang, X. Wang, Y. Zhou, S. Zhang, C. Li, D. Hu, L. Xu and H. Jiao, *ACS Appl. Electron. Mater.*, 2019, **1**, 1046-1053.
- 11 C. Lee, Z. Bao, M. H. Fang, T. Lesniewski, S. Mahlik, M. Grinberg, G. Leniec, S. M. Kaczmarek, M. G. Brik, Y. T. Tsai, T. L. Tsai and R. S. Liu, *Inorg. Chem.*, 2020, **59**, 376-385.
- 12 H. Zeng, T. Zhou, L. Wang and R. J. Xie, *Chem. Mater.*, 2019, **31**, 5245-5253.
- 13 A. Zabiliute, S. Butkute, A. Zukauskas, P. Vitta and A. Kareiva, *Appl. Opt.*, 2014, **53**, 907-914.
- 14 S. Liu, Z. Wang, H. Cai, Z. Song and Q. Liu, *Inorganic Chemistry Frontiers*, 2020, **7**, 1467-1473.
- 15 B. Henderson and G. F. Imbusch, *Optical spectroscopy of inorganic solids*, Oxford University Press, 2006.
